# Supplementary material for: Paracoccidioides Genomes Reflect High Levels of Species Divergence and Little Interspecific Gene Flow
Source: PubMed Central journal article supplement (PMC8534288; doi:10.1128/mbio.01999-20), 2020-12-22

**Pb300**  
*P. venezuelensis*

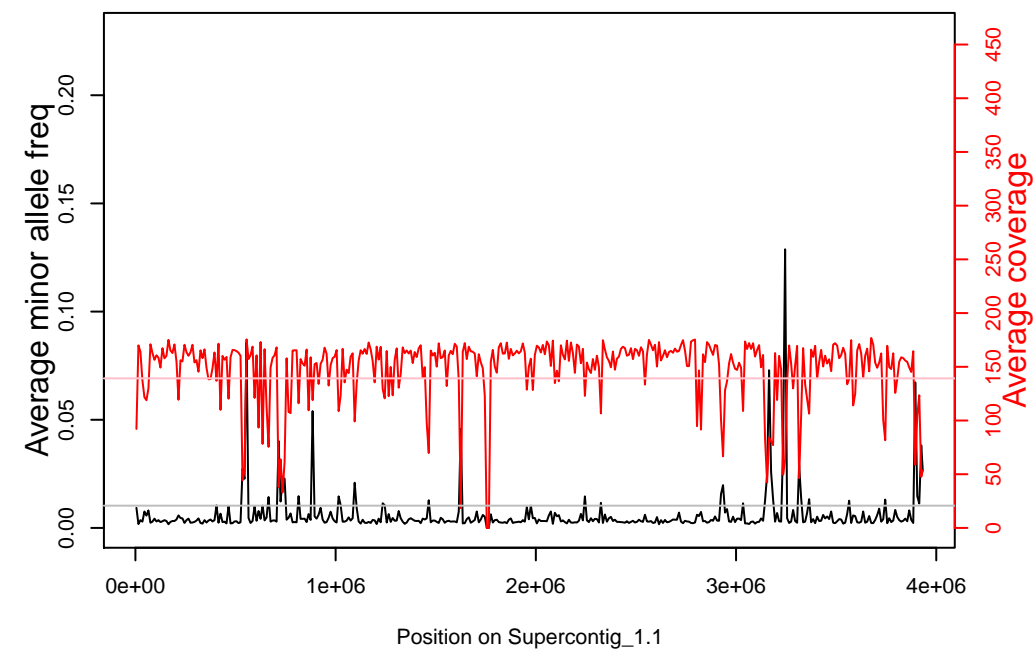

**Pb300**  
*P. venezuelensis*

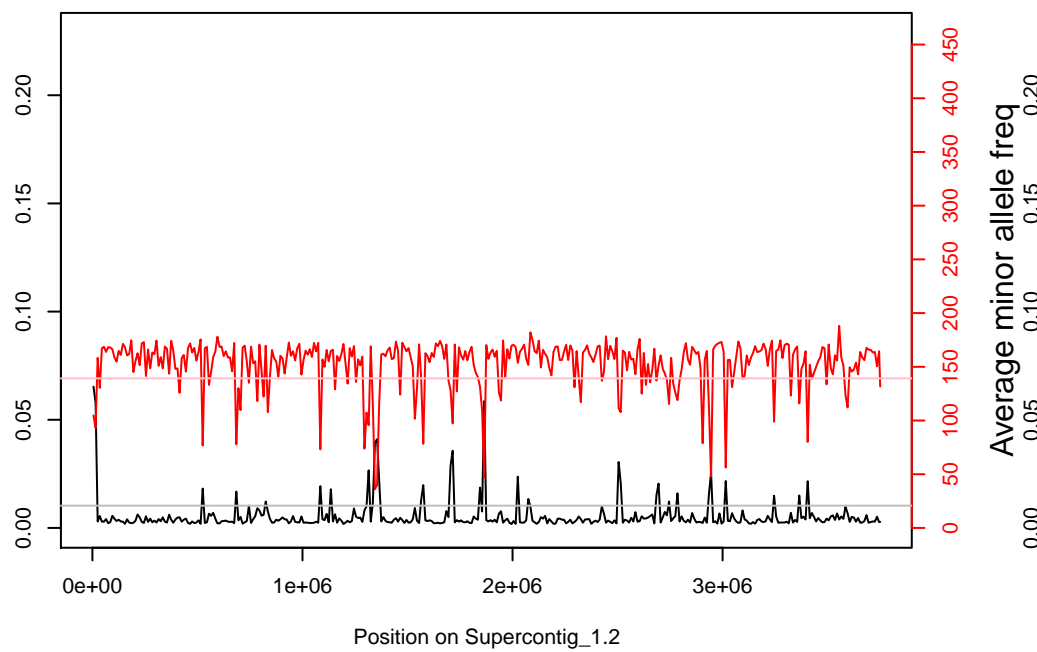

**Pb300**  
*P. venezuelensis*

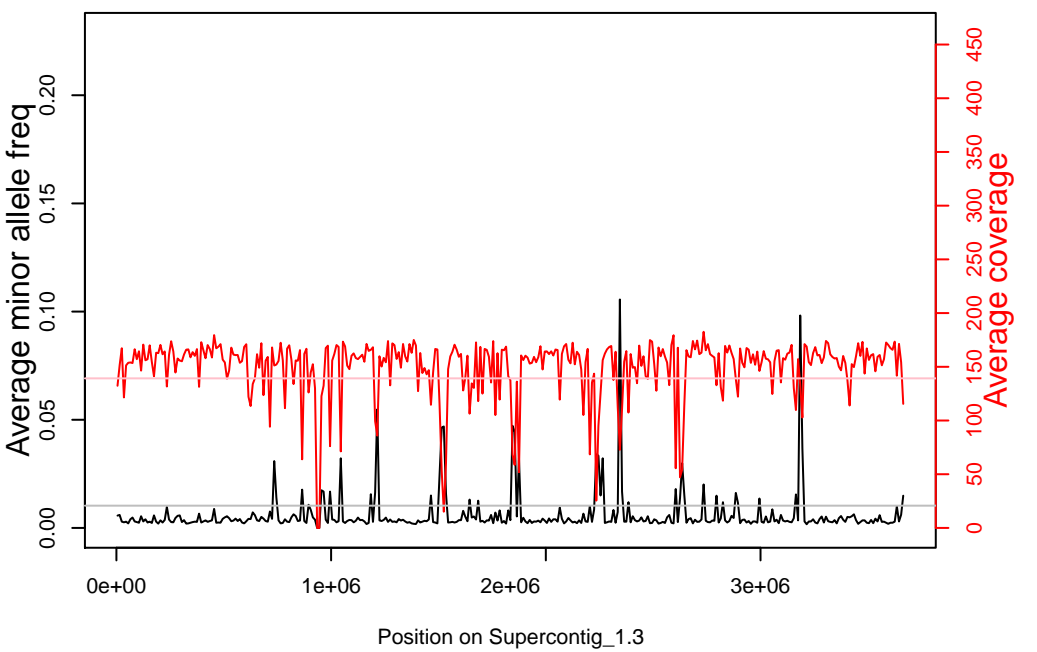

**Pb300**  
*P. venezuelensis*

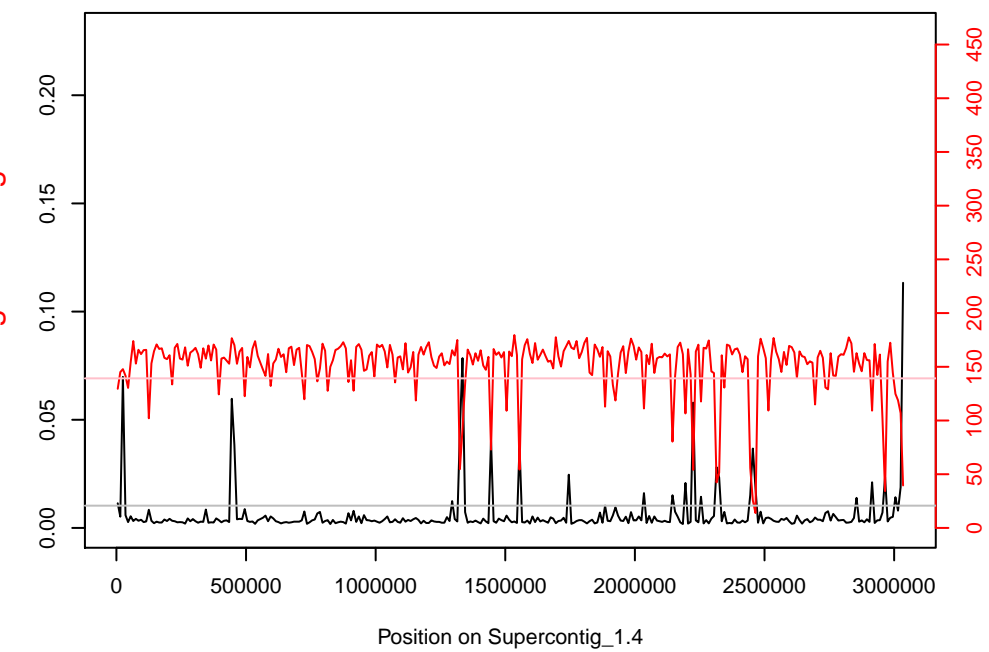

**Pb300**  
*P. venezuelensis*

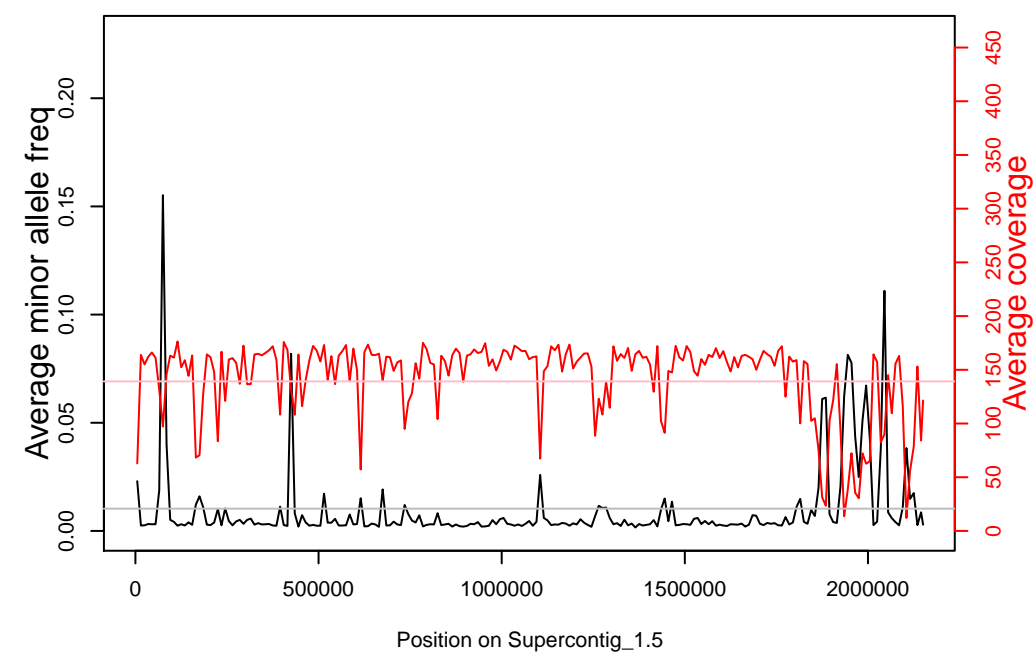

**Pb300**  
*P. venezuelensis*

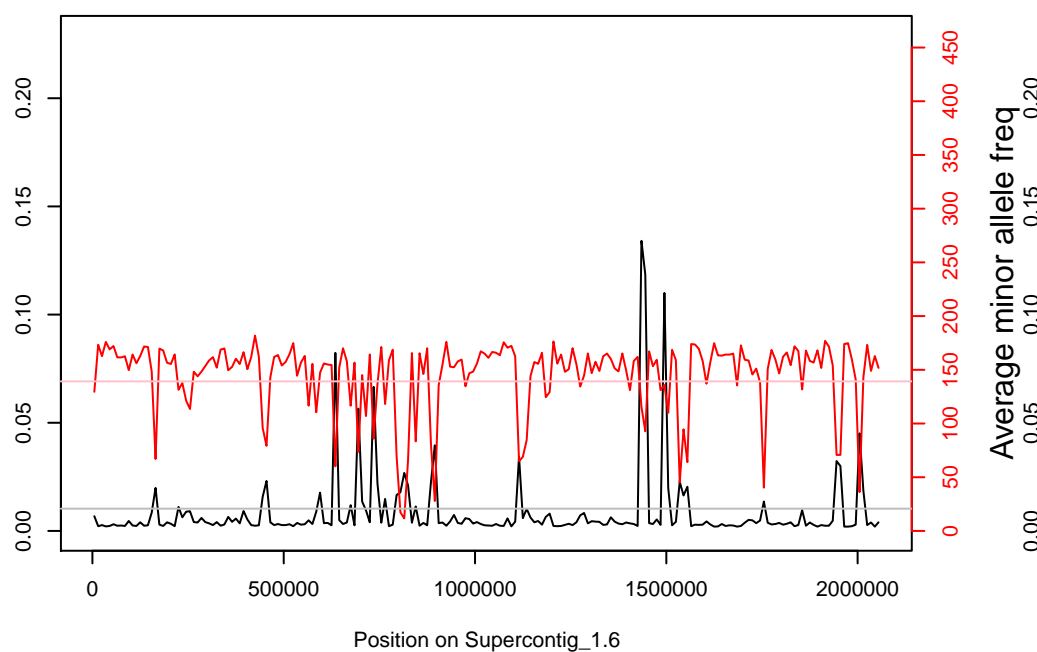

**Pb300**  
*P. venezuelensis*

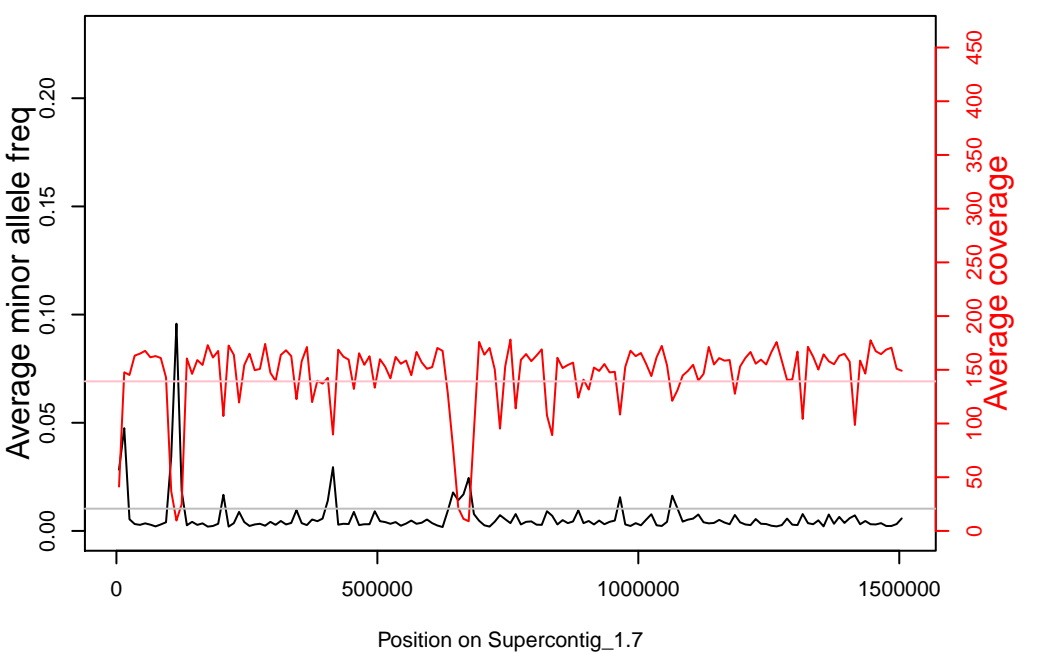

**Pb300**  
*P. venezuelensis*

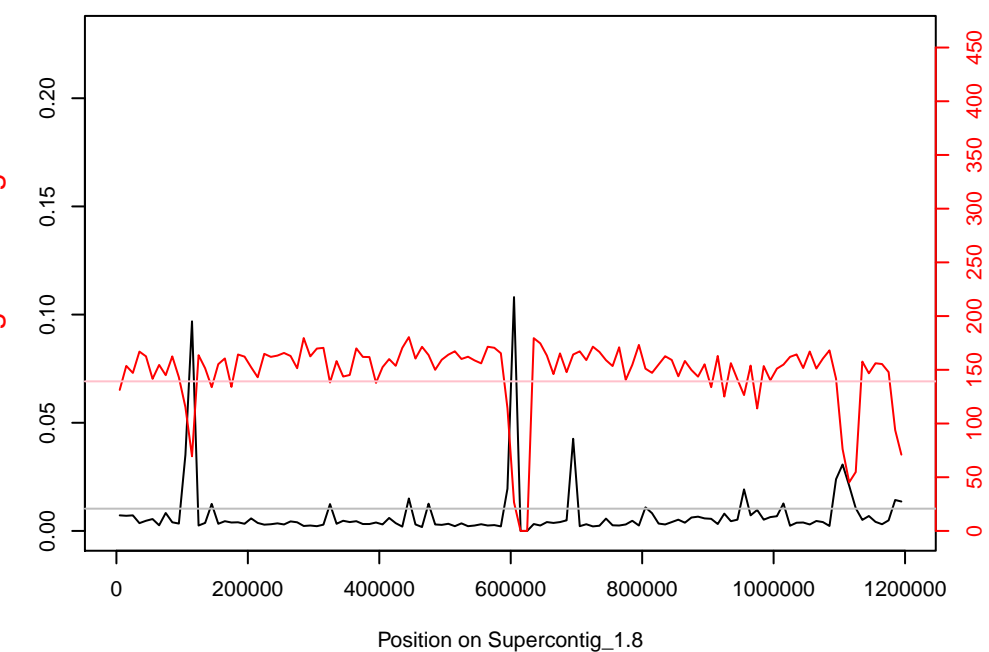

**Pb300**  
*P. venezuelensis*

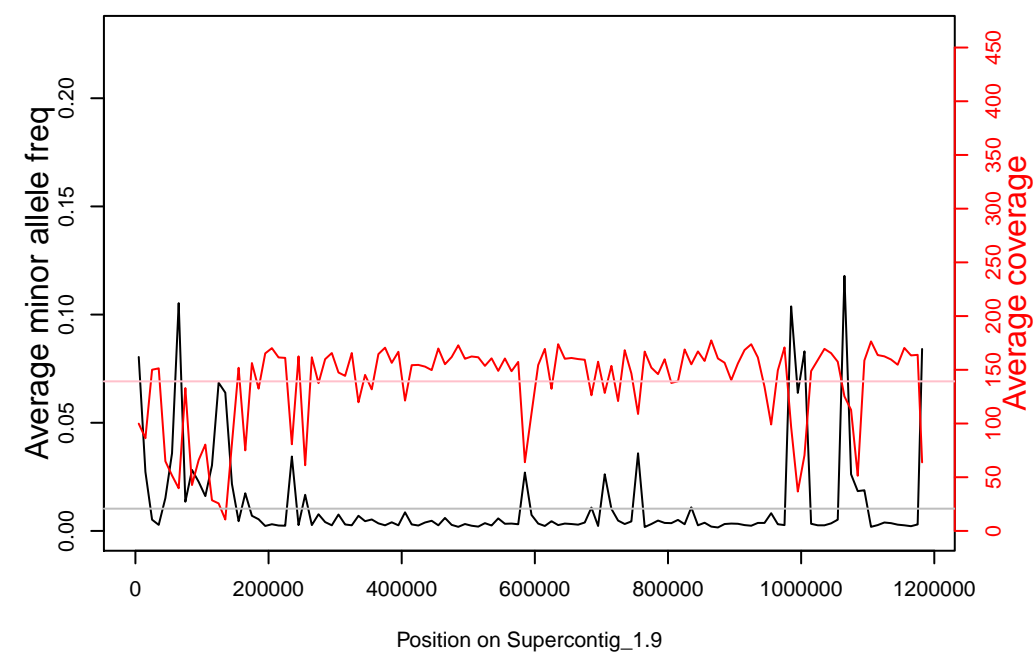

**Pb300**  
*P. venezuelensis*

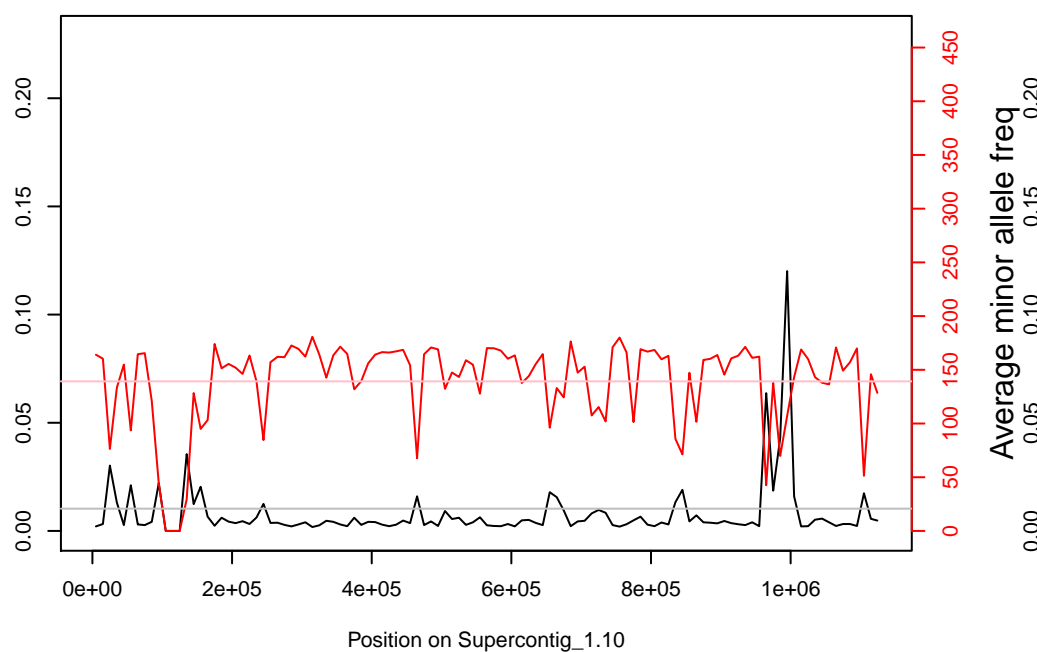

**Pb300**  
*P. venezuelensis*

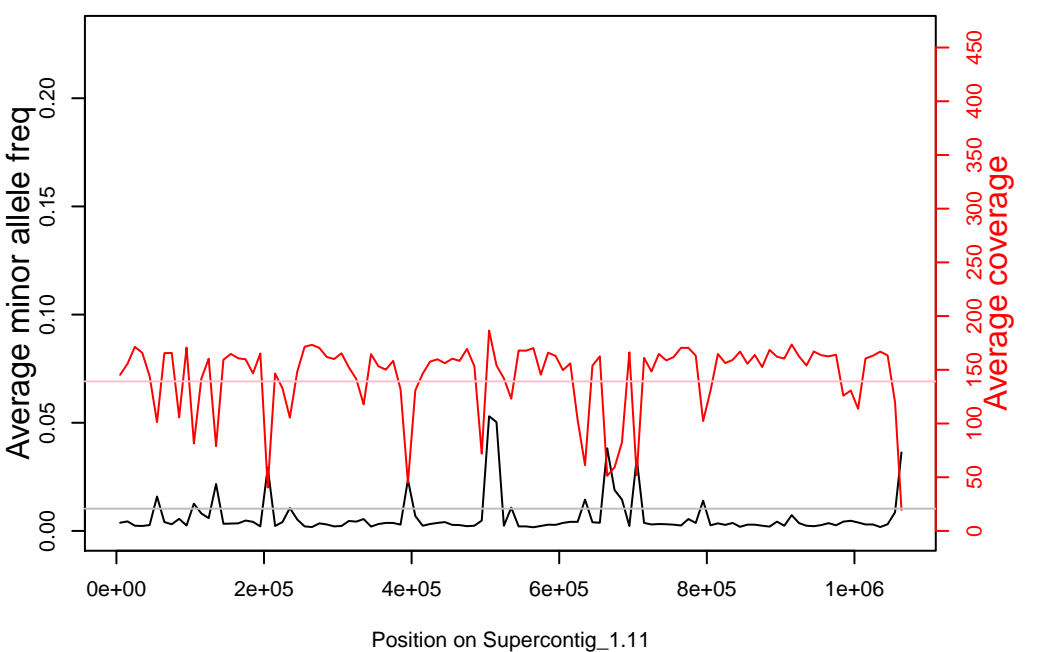

**Pb300**  
*P. venezuelensis*

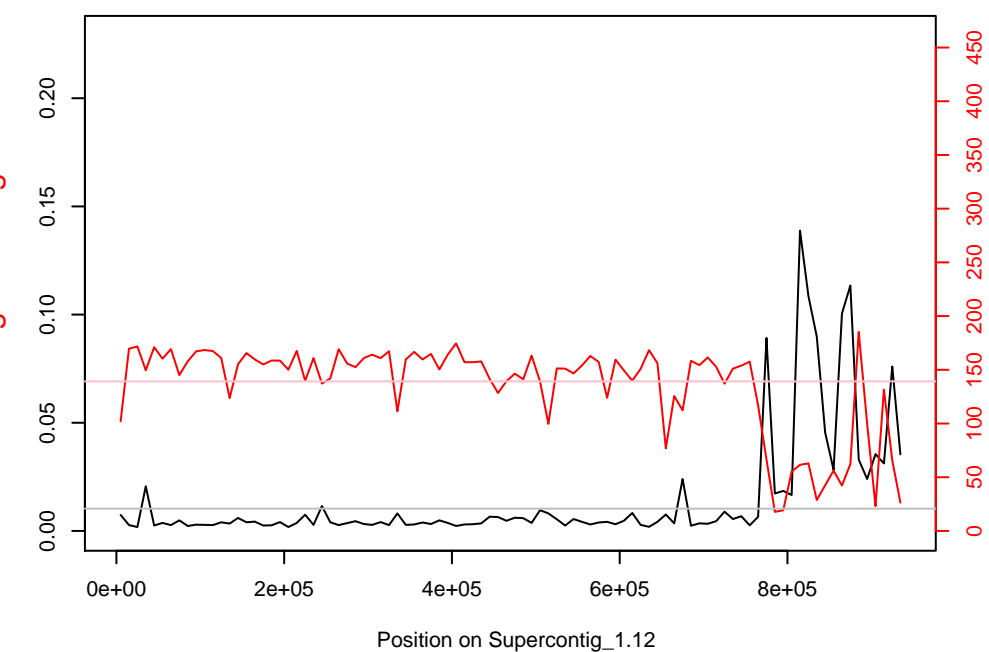

**Pb300**  
*P. venezuelensis*

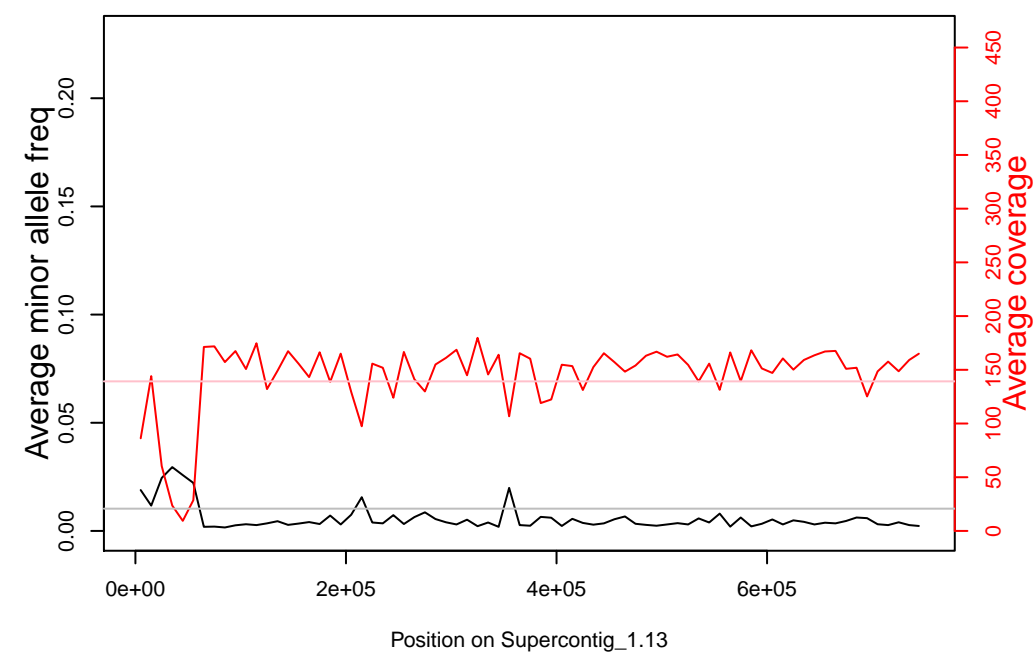

**Pb300**  
*P. venezuelensis*

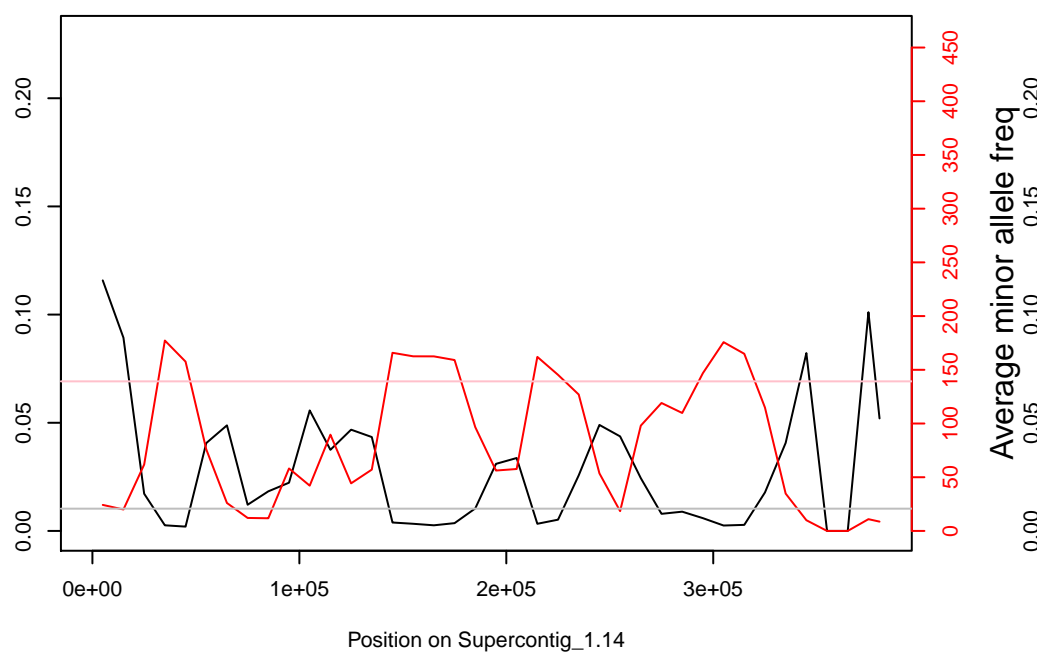

**Pb300**  
*P. venezuelensis*

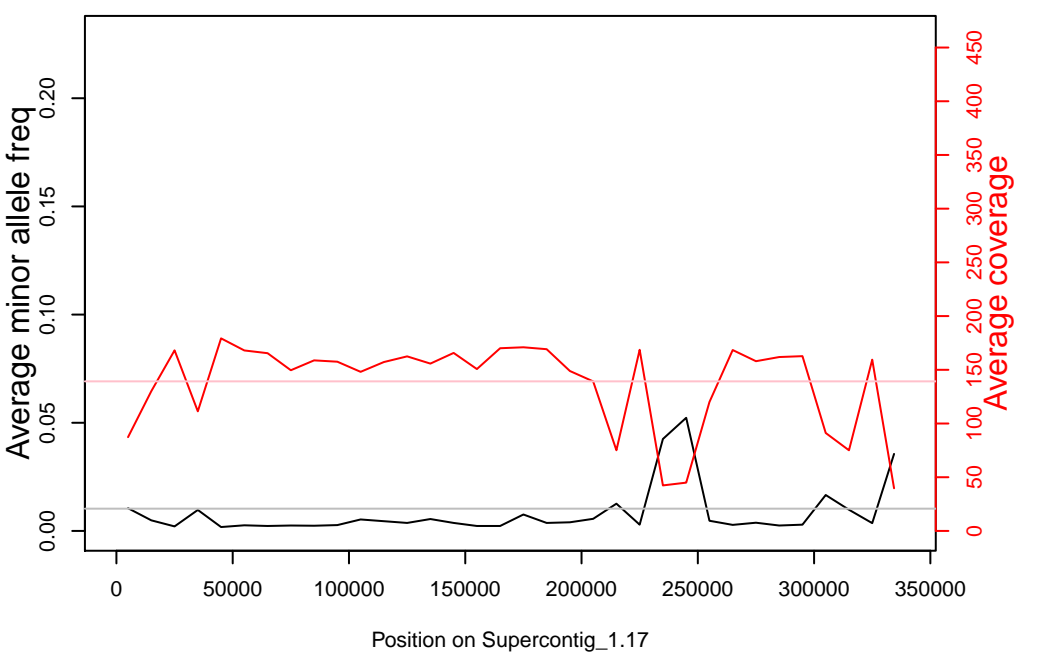

**Pb300**  
*P. venezuelensis*

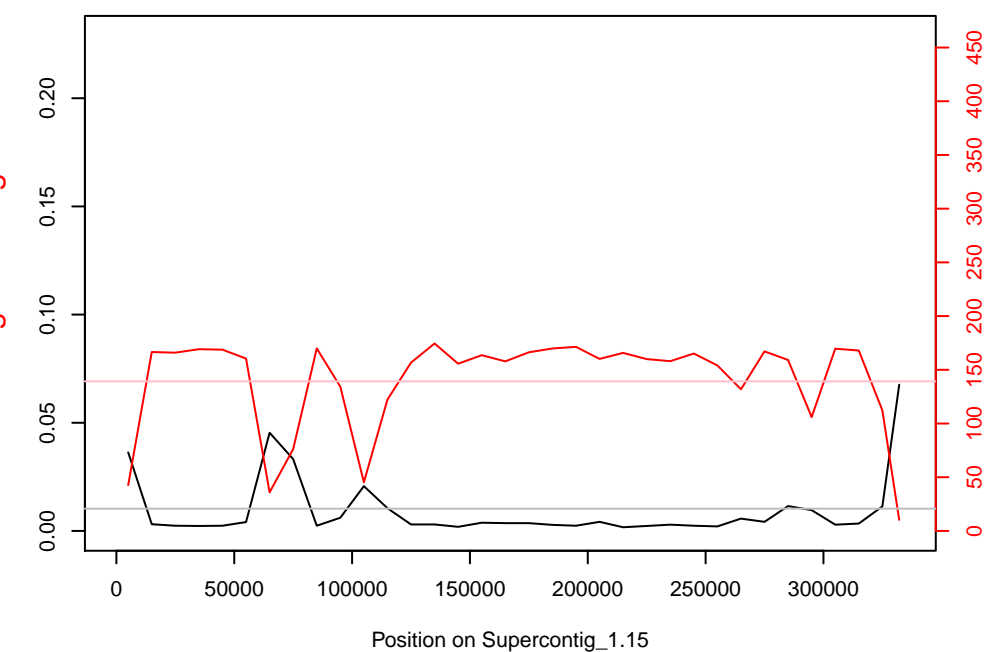

Supplement: mbio.01999-20-sf005.pdf [file mbio.01999-20-sf005.pdf]
