# Supplementary material for: Paracoccidioides Genomes Reflect High Levels of Species Divergence and Little Interspecific Gene Flow
Source: PubMed Central journal article supplement (PMC8534288; doi:10.1128/mbio.01999-20), 2020-12-22

**Supercontig\_1.2 2512546 – 2565821;  
53.3kb 11 inds;  
max\_introgres\_snp = 63**

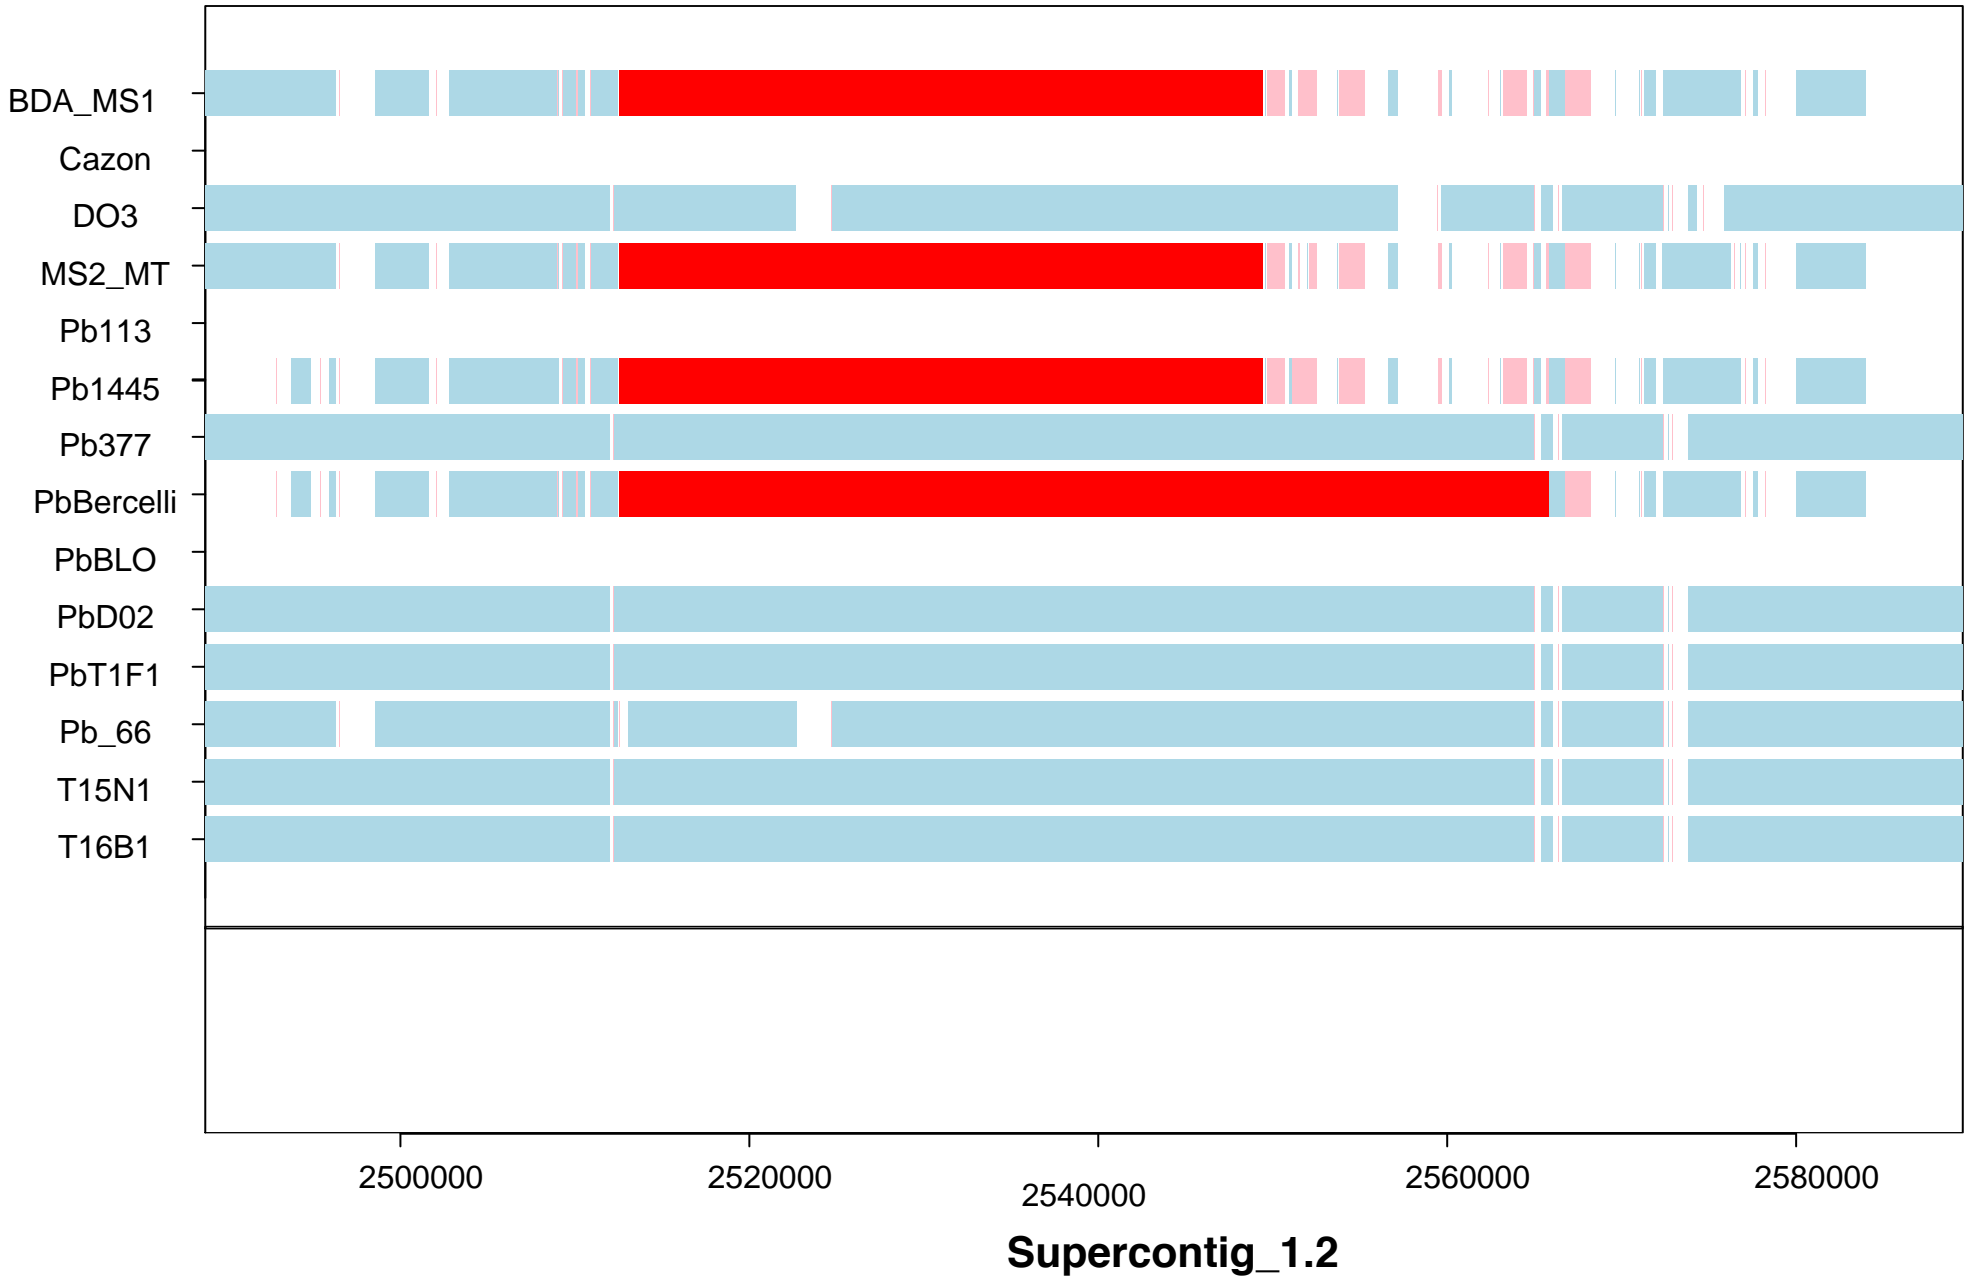

Supplement: mbio.01999-20-sf001.pdf [file mbio.01999-20-sf001.pdf]
