# Supplementary material for: Paracoccidioides Genomes Reflect High Levels of Species Divergence and Little Interspecific Gene Flow
Source: PubMed Central journal article supplement (PMC8534288; doi:10.1128/mbio.01999-20), 2020-12-22

**Supercontig 1.1**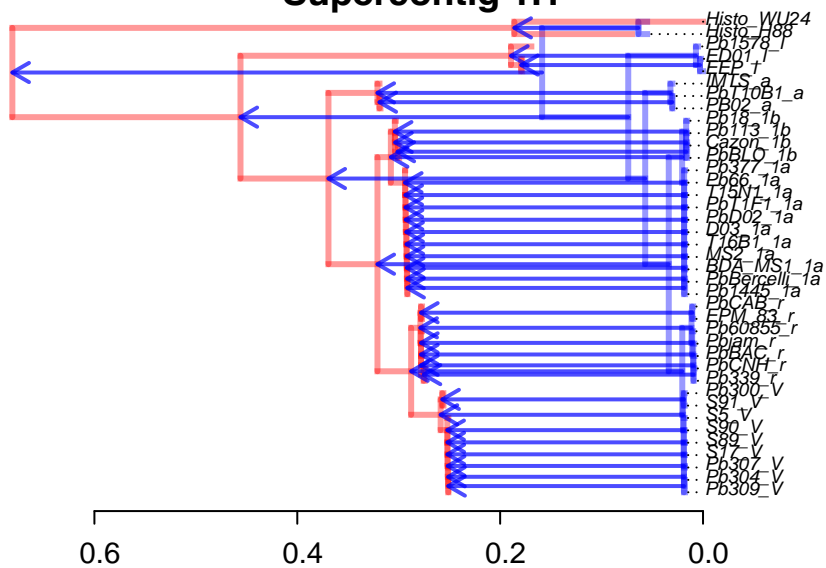**Supercontig 1.2**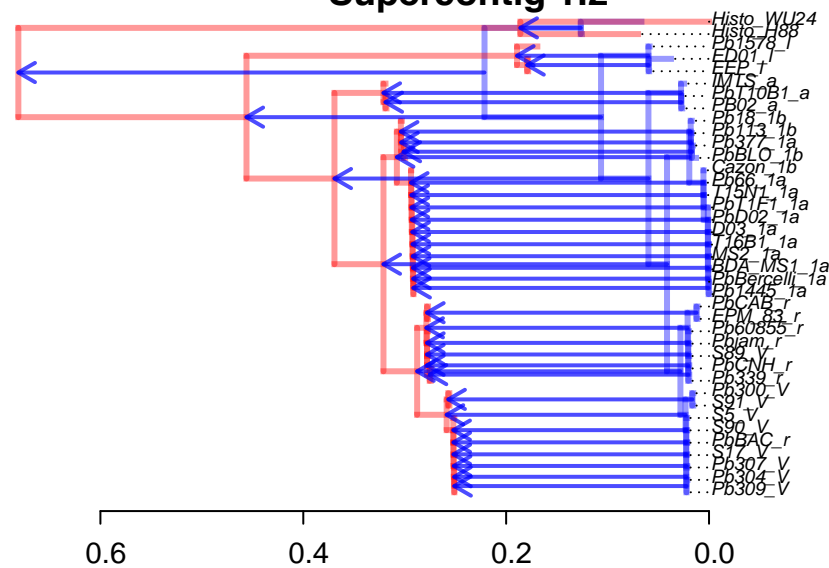**Supercontig 1.3**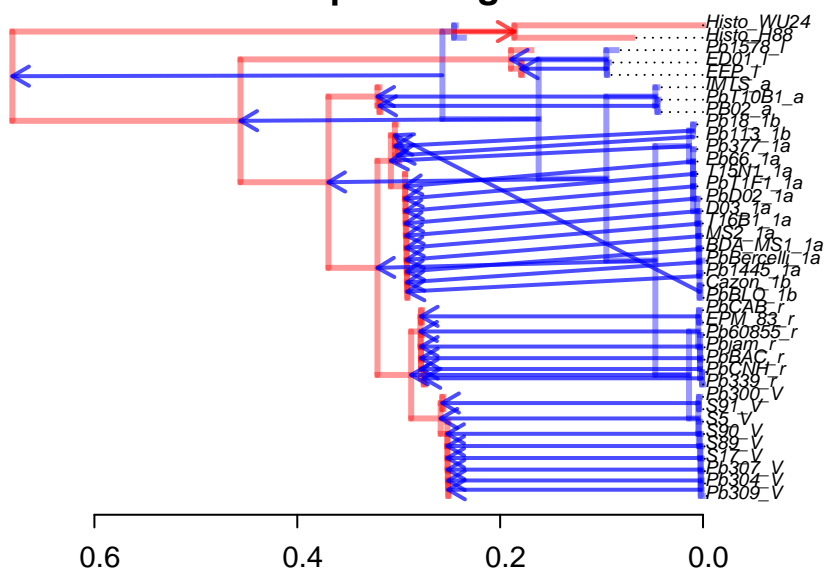**Supercontig 1.4**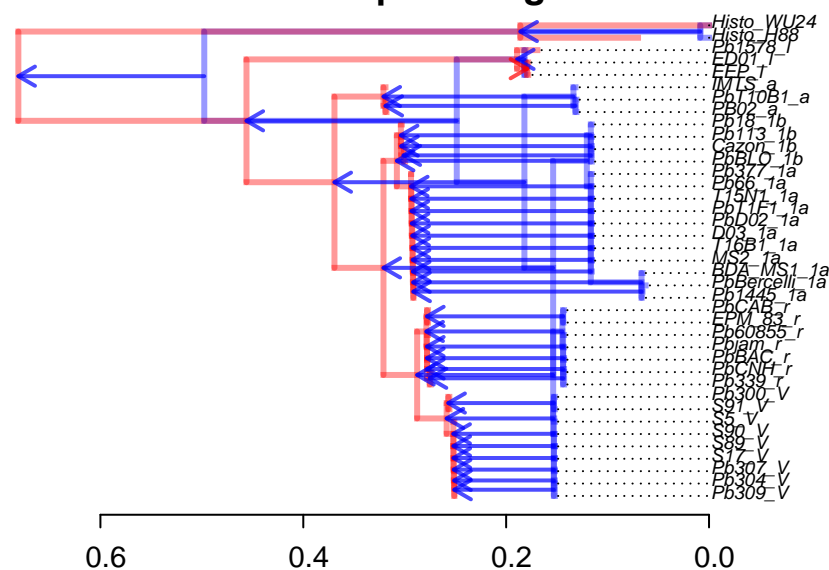**Supercontig 1.5**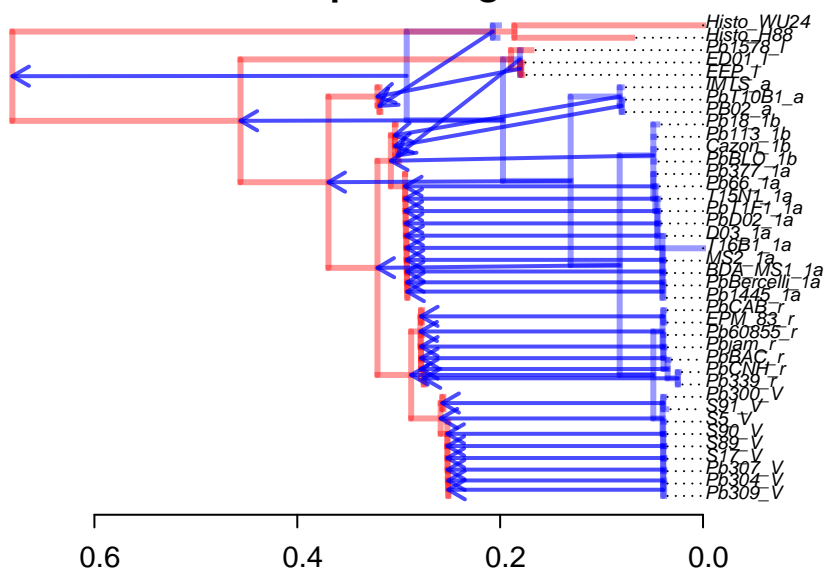**Supercontig 1.6**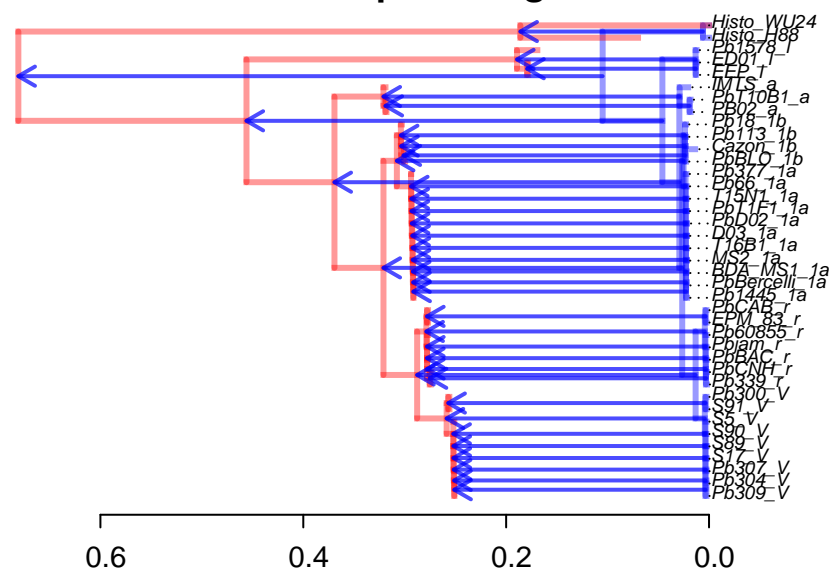

Supplement: mbio.01999-20-sf006.pdf [file mbio.01999-20-sf006.pdf]
