# Supplementary material for: Paracoccidioides Genomes Reflect High Levels of Species Divergence and Little Interspecific Gene Flow
Source: PubMed Central journal article supplement (PMC8534288; doi:10.1128/mbio.01999-20), 2020-12-22
Supplement: mbio.01999-20-sf007.pdf [file mbio.01999-20-sf007.pdf]

### A. Supercontig 1.2

FD distance = 24

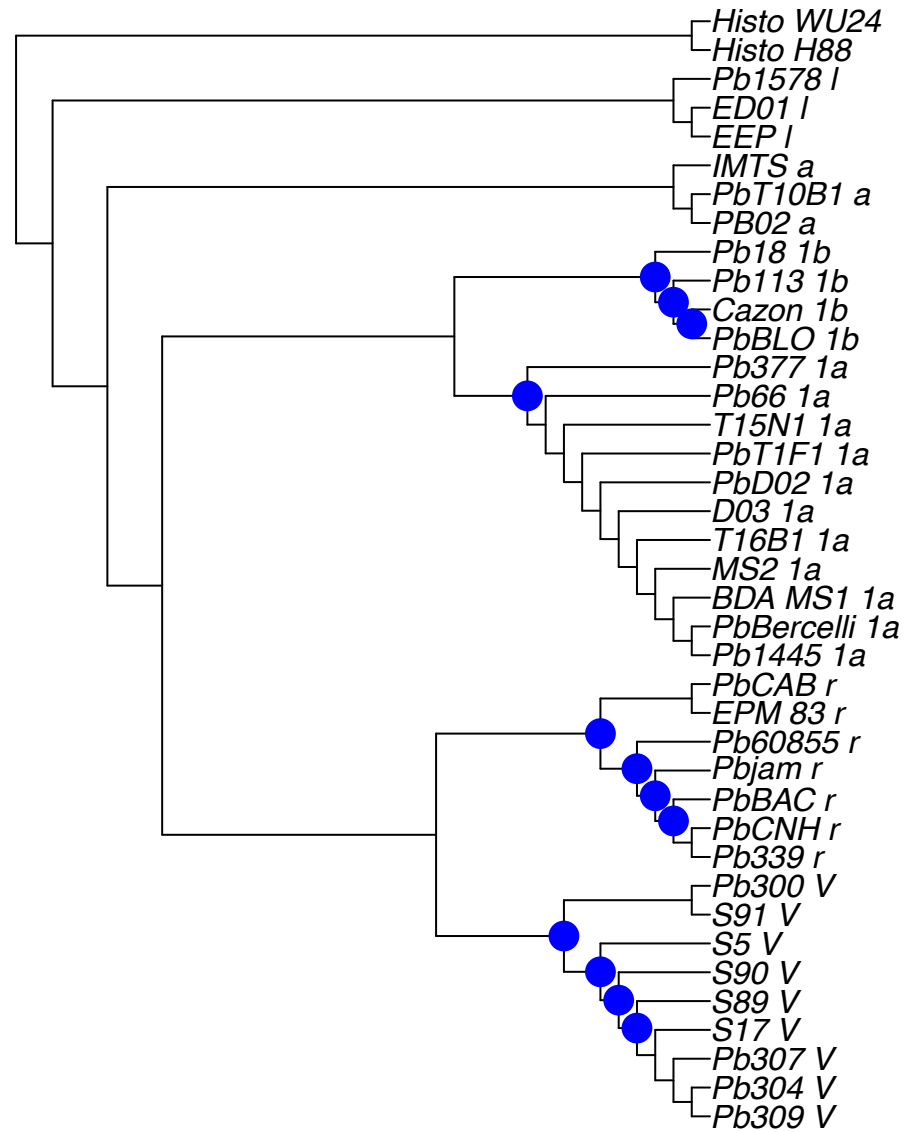

### B. Supercontig 1.3

FD distance = 23

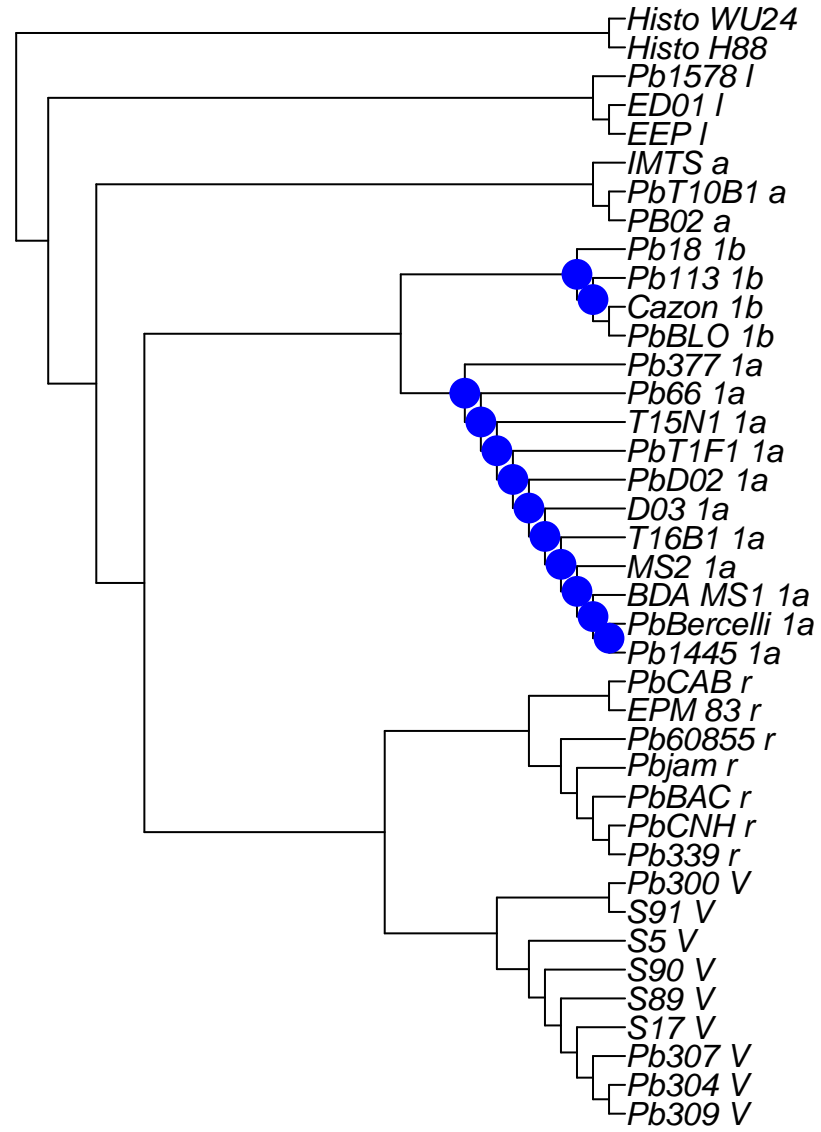

### C. Supercontig 1.5

FD distance = 3

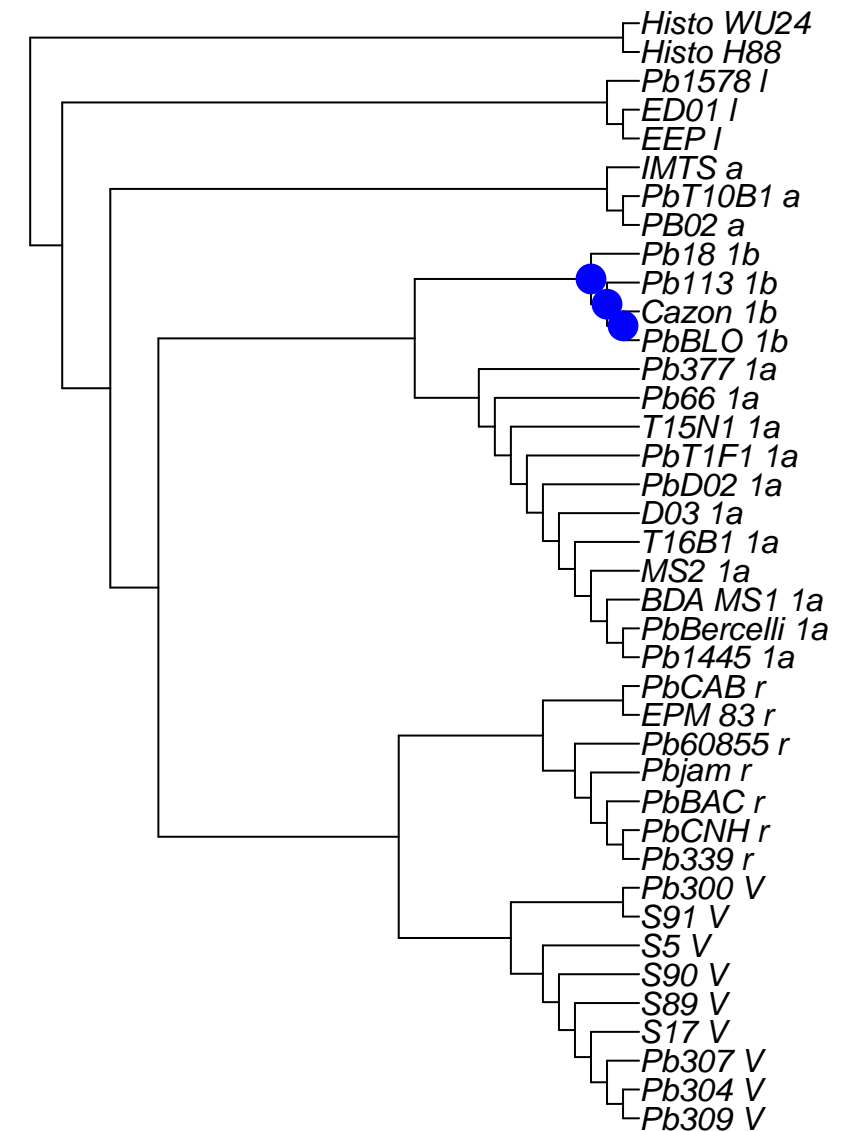

• Clade absent in the supercontig tree
