# Supplementary material for: Paracoccidioides Genomes Reflect High Levels of Species Divergence and Little Interspecific Gene Flow
Source: PubMed Central journal article supplement (PMC8534288; doi:10.1128/mbio.01999-20), 2020-12-22

**A. Nucleotide diversity ( $\pi$ )  
*P. lutzii* and *P. brasiliensis***

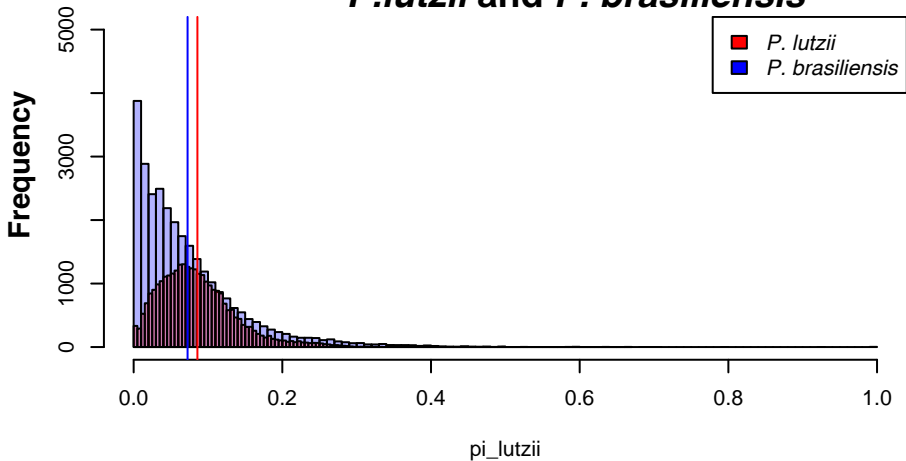

**B. Dxy,  
*P. lutzii* and *P. brasiliensis***

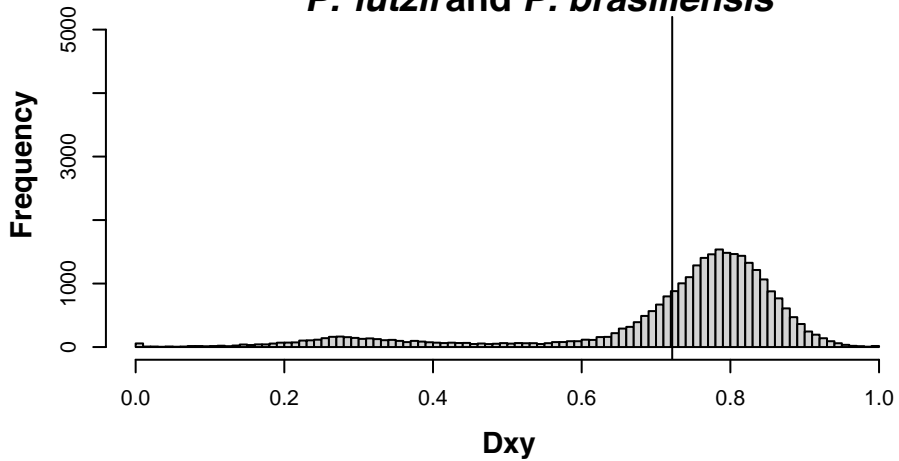

**C. Nucleotide diversity ( $\pi$ )  
*P. lutzii* and *P. americana***

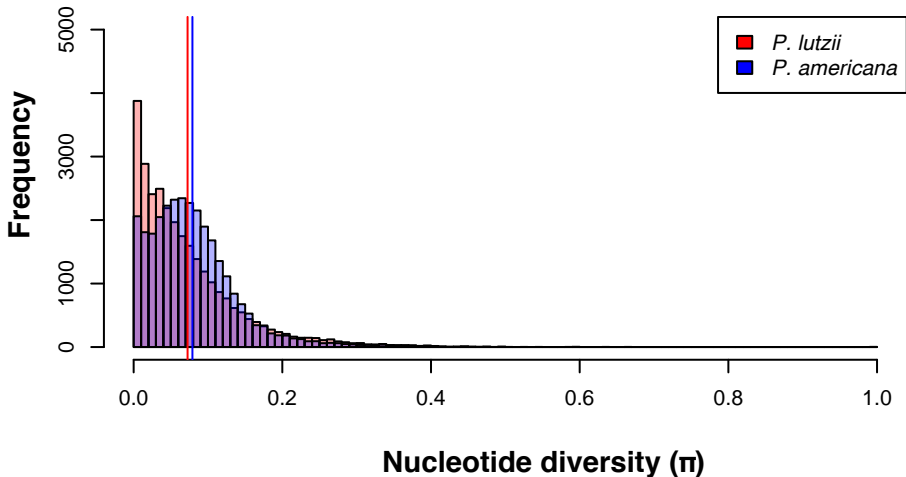

**D. Dxy,  
*P. lutzii* and *P. americana***

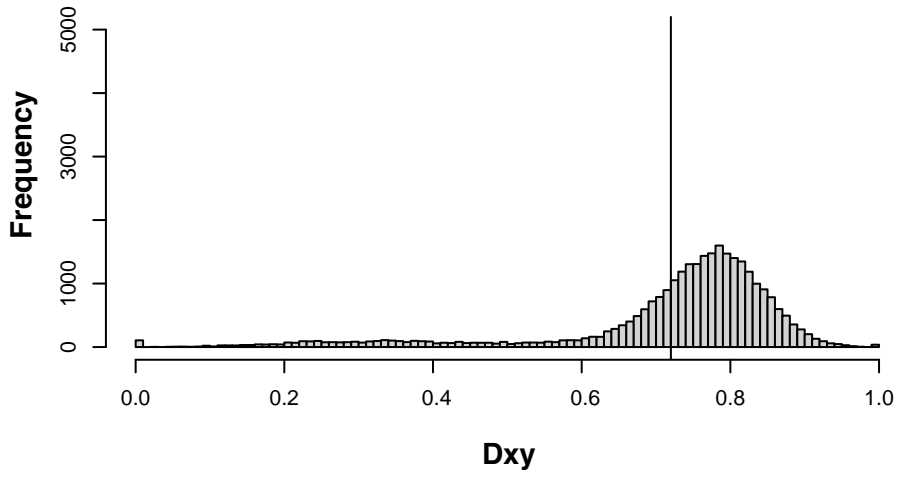

**E. Nucleotide diversity ( $\pi$ )  
*P. lutzii* and *P. restrepiensis***

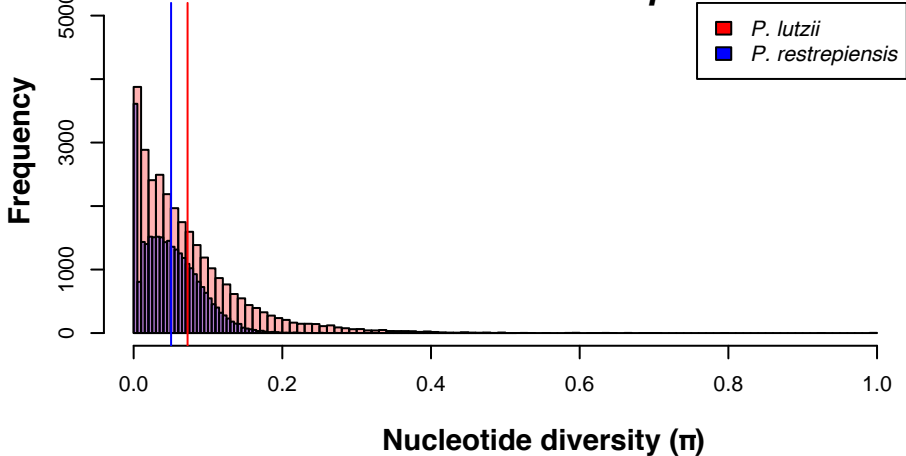

**F. Dxy,  
*P. lutzii* and *P. restrepiensis***

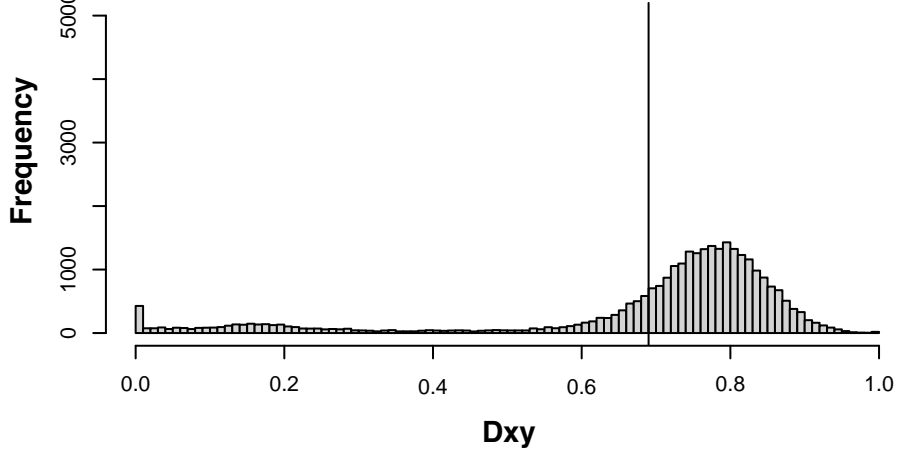

**G. Nucleotide diversity ( $\pi$ )  
*P. lutzii* and *P. venezuelensis***

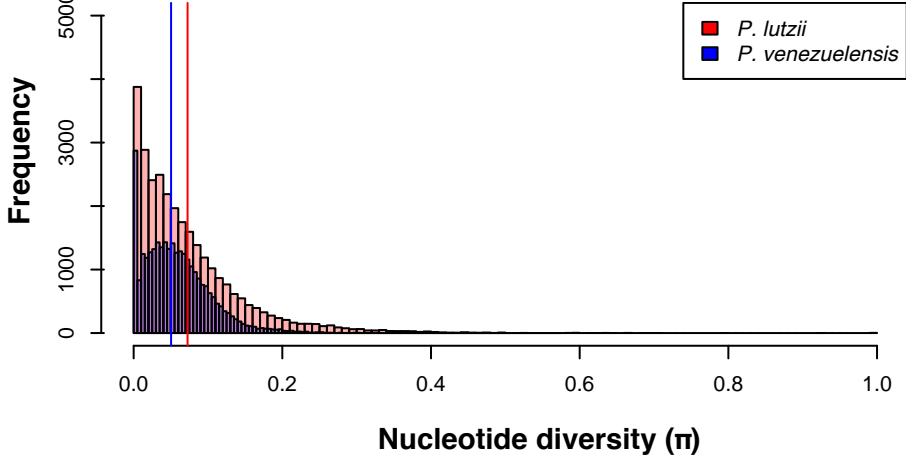

**H. Dxy,  
*P. lutzii* and *P. venezuelensis***

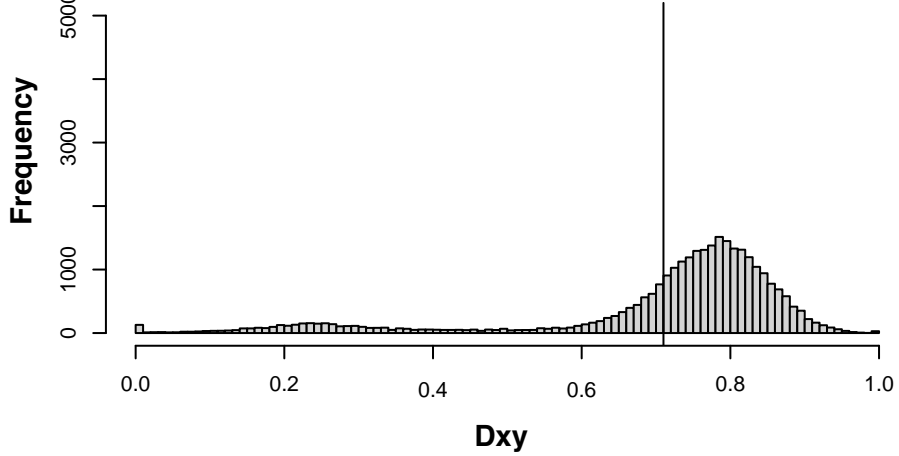

Supplement: mbio.01999-20-sf008.pdf [file mbio.01999-20-sf008.pdf]
